# Supplementary material
Source: PubMed Central journal article supplement (PMC6317992)
Supplement: NIHMS1001925-supplement-supplement.pdf [file NIHMS1001925-supplement-supplement.pdf]

In the format provided by the authors and unedited.

# Structural mechanisms of selectivity and gating in anion channelrhodopsins

Hideaki E. Kato<sup>1,2,13\*</sup>, Yoon Seok Kim<sup>3,4,5,13</sup>, Joseph M. Paggi<sup>6,7</sup>, Kathryn E. Evans<sup>3,4,5</sup>, William E. Allen<sup>3,4,5</sup>, Claire Richardson<sup>6</sup>, Keiichi Inoue<sup>2,10,11</sup>, Shota Ito<sup>10</sup>, Charu Ramakrishnan<sup>3,4,5</sup>, Lief E. Fenno<sup>3,4,5</sup>, Keitaro Yamashita<sup>12</sup>, Daniel Hilger<sup>1</sup>, Soo Yeun Lee<sup>3,4,5</sup>, Andre Berndt<sup>3,4,5</sup>, Kang Shen<sup>8,9</sup>, Hideki Kandori<sup>10,11</sup>, Ron O. Dror<sup>6,7</sup>, Brian K. Kobilka<sup>1</sup> & Karl Deisseroth<sup>3,4,5\*</sup>

<sup>1</sup>Department of Molecular and Cellular Physiology, Stanford University School of Medicine, Stanford, CA, USA. <sup>2</sup>PRESTO, Japan Science and Technology Agency, Kawaguchi, Japan. <sup>3</sup>Department of Bioengineering, Stanford University, Stanford, CA, USA. <sup>4</sup>Department of Psychiatry and Behavioral Sciences, Stanford University, Stanford, CA, USA. <sup>5</sup>Howard Hughes Medical Institute, Stanford University, Stanford, CA, USA. <sup>6</sup>Department of Computer Science, Stanford University, Stanford, CA, USA. <sup>7</sup>Institute for Computational and Mathematical Engineering, Stanford University, Stanford, CA, USA. <sup>8</sup>Department of Biology, Stanford University, Stanford, CA, USA. <sup>9</sup>Howard Hughes Medical Institute, Stanford University, Stanford, CA, USA. <sup>10</sup>Department of Life Science and Applied Chemistry, Nagoya Institute of Technology, Nagoya, Japan. <sup>11</sup>OptoBioTechnology Research Center, Nagoya Institute of Technology, Nagoya, Japan. <sup>12</sup>RIKEN SPring-8 Center, Hyogo, Japan. <sup>13</sup>These authors contributed equally: Hideaki E. Kato; Yoon Seok Kim. \*e-mail: hekato@stanford.edu; deissero@stanford.edu

## Supplementary Discussion

### Distinct photocycles in iC<sup>++</sup> and GtACR1

Both iC<sup>++</sup> and GtACR1 work as light-gated anion channels, but their photocycles are remarkably different. While GtACR1 has 5 intermediate states (K, L, M, N, and O), iC<sup>++</sup> has only three photo-distinguishable intermediate states (K, M and O), and the lifetime of the K intermediate is unusually long. The K-intermediate state is generally characterized by the 13-*cis* retinal twisted around the C14-C15 bond. The twisted retinal becomes planar during the transition from K- to L- intermediate state, and the Schiff base proton is transferred from the Schiff base nitrogen to the proton acceptor during the transition from L- to M- intermediate state. Since iC<sup>++</sup> has an unusually long K-intermediate state and does not exhibit the L-intermediate, some of the mutations introduced to engineer iC<sup>++</sup> (i.e. T98S, E129Q, E162S, and/or N297Q) may change the local environment around the Schiff base and inhibit the efficient relaxation of the twist around the C14-C15 bond of 13-*cis* retinal. The proton would be directly transferred from the Schiff base nitrogen of twisted retinal to the proton acceptor (probably Asp292), and thereby iC<sup>++</sup> could skip the L-intermediate state.

### Ion selectivity in ACRs

This study supports a framework in which both nACR and dACR follow the overall surface-electrostatic model for pore selectivity, in which the contribution of each individual amino acid position to anion selectivity can vary between ACRs. In iC<sup>++</sup>, amino acids at the CCS (Q129 and Q297) position are particularly important for ion selectivity, and as shown in Fig. 3e, the Q129E/Q297E double mutation depolarizes  $V_{rev}$  by ~40 mV. An additional 8 mutations (T98S, E122N, E140S, V156R, E162S, V281R, T285N, and E312S) mainly introduced inside the ion-conducting pathway work cooperatively, creating an electropositive surface suitable for anion selectivity, and thus further hyperpolarize  $V_{rev}$  by 20 mV. This pattern also holds for another dACR (iChloC, in which the E-to-R mutation to E90 (Glu-129 in iC<sup>++</sup>) decreases  $V_{rev}$  from ~+10 to ~-40 mV<sup>4</sup>). An additional four mutations, E83Q, E101S, D156N, and T159C (E122Q, E140S, D195N, and T198C in iC<sup>++</sup> numbering, respectively), of which the first two are introduced inside the ion-conducting pathway, further hyperpolarize  $V_{rev}$  to ~-65 mV<sup>5</sup>. The mutational tests for positions inside the nACR ion-conducting pathway tend to show more

variable contribution to anion selectivity; while Gln-46, another residue comprising the CCS in *GtACR1*, does contribute to anion selectivity (lowering  $V_{rev}$  by  $\sim 15$  mV), the E-to-Q mutation of Glu-68 (Glu-129 in *iC++*) does not significantly change  $V_{rev}$  (Fig. 3e; this mutation however would be predicted to give rise to a more mild electrostatic effect than the E-to-R mutation in *iChloc* noted above), and positively-charged residues positioned at the nACR ion-conducting pathway vestibules appear important for tuning the electropositive surface suitable for anion conduction. Therefore, although both dACR and nACR follow the pore surface-electrostatic model, thus far the tested residues contributing most to anion selectivity in dACRs have been found positioned at the CCS or inside the ion-conducting pathway, and the tested residues found to contribute more to anion selectivity in nACRs have been positioned near the vestibules of the ion-conducting pathway. Structures for additional ChRs will be informative regarding possible evolutionary contributions to this pattern and to chloride/cation selectivity in general, and already our demonstrated ability to interconvert ChR ion selectivity (CCR $\rightarrow$ ACR and now ACR $\rightarrow$ CCR), guided by our crystal structures and structure-informed electrostatic model, may help in the screening of ChR sequences for informative new variants in nature.

### **Relationship between distribution of charged residues and photocurrent amplitude**

Both *iC++* and *GtACR1* have several positively charged residues that govern exclusive anion selectivity, but their distributions are completely different, consistent with the overall surface-electrostatic model and not with a model involving singular high-affinity binding sites. These different distributions (in the setting of similar ion selectivity) not only support the selectivity model but also may be relevant to explaining differences in photocurrent amplitude, a distinct ChR property in which *iC++* and *GtACR1* differ markedly. Except for the Schiff base lysine, *iC++* has four positively charged residues along the pore (Lys-132, Arg-156, Arg-159, and Arg-281), but only one of these is conserved in *GtACR1*, and Lys-132, Arg-156, and Arg-281 are replaced by Thr-71, Pro-91, and Glu-223, respectively. Instead, *GtACR1* has 12 positively charged residues at and near the pore vestibules, which create an electropositive surface suitable for anion selectivity. Because of its lysine and arginine residues inside the ion-conducting pathway, the surface of pore in *iC++* is predicted to be more “sticky” for substrate anions. As proposed for potassium and calcium channels previously<sup>48,49</sup>, ions tightly binding to the inner surface of the pore will exhibit lower mobility. Therefore the lower conductance of *iC++* relative

to *GtACR1* may be understood from the structures and a sticky-pore model, and it will be of interest to see if this pattern can be extended to CCRs.
